# Supplementary material for: Impact of Sensor Data Characterization with Directional Nature of Fault and Statistical Feature Combination for Defect Detection on Roll-to-Roll Printed Electronics
Source: MDPI journal article supplement (doi:10.3390/s21248454), 2021-12-18
Supplement: s1 [file s1]

## Supplementary Materials

**Table S1.** Sensor data efficiency evaluation of doctor blade tilting fault under operating tension 2kgf.

| [SVM]                                   | Raw data | Sensor 1 | Sensor 2 | Value                                        |
|-----------------------------------------|----------|----------|----------|----------------------------------------------|
| Data Capacity [Mb] ( $\alpha$ )         | 115      | 44       | 47       | $\alpha_{S1} = 2.61$<br>$\alpha_{S2} = 2.44$ |
| Processing Time [sec] ( $\beta$ )       | 1508.9   | 518.0    | 521.5    | $\beta_{S1} = 2.91$<br>$\beta_{S2} = 2.89$   |
| Misclassification Rate [%] ( $\gamma$ ) | 41.8     | 19.3     | 19.4     | $\gamma_{S1} = 0.46$<br>$\gamma_{S2} = 0.46$ |

**Table S2.** Sensor data efficiency evaluation of doctor blade tilting fault under operating tension 4kgf.

| [SVM]                                   | Raw data | Sensor 1 | Sensor 2 | Value                                        |
|-----------------------------------------|----------|----------|----------|----------------------------------------------|
| Data Capacity [Mb] ( $\alpha$ )         | 100      | 40       | 42       | $\alpha_{S1} = 2.50$<br>$\alpha_{S2} = 2.38$ |
| Processing Time [sec] ( $\beta$ )       | 6340.4   | 1339.4   | 1507.6   | $\beta_{S1} = 2.72$<br>$\beta_{S2} = 2.41$   |
| Misclassification Rate [%] ( $\gamma$ ) | 51.9     | 20.2     | 21.7     | $\gamma_{S1} = 0.39$<br>$\gamma_{S2} = 0.42$ |

**Table S3.** Sensor data efficiency evaluation of doctor blade tilting fault under operating tension 6kgf.

| [SVM]                                   | Raw data | Sensor 1 | Sensor 2 | Value                                        |
|-----------------------------------------|----------|----------|----------|----------------------------------------------|
| Data Capacity [Mb] ( $\alpha$ )         | 113      | 44       | 48       | $\alpha_{S1} = 2.56$<br>$\alpha_{S2} = 2.35$ |
| Processing Time [sec] ( $\beta$ )       | 368.4    | 85.7     | 88.7     | $\beta_{S1} = 4.30$<br>$\beta_{S2} = 4.15$   |
| Misclassification Rate [%] ( $\gamma$ ) | 32.8     | 13.9     | 21.3     | $\gamma_{S1} = 0.42$<br>$\gamma_{S2} = 0.65$ |

**Table S4.** Doctor blade tilting fault diagnosis result based on sensor 1

| <b>[SVM]</b>          | <b>2kgf</b>  | <b>4kgf</b>   | <b>6kgf</b> |
|-----------------------|--------------|---------------|-------------|
| Accuracy [%]          | <b>80.7</b>  | <b>79.8</b>   | <b>86.1</b> |
| Processing Time [sec] | <b>518.0</b> | <b>1339.4</b> | <b>85.7</b> |
| Data Capacity [Mb]    | <b>44</b>    | <b>40</b>     | <b>44</b>   |

**Table S5.** Doctor blade tilting fault diagnosis result based on sensor 2

| <b>[SVM]</b>          | <b>2kgf</b> | <b>4kgf</b> | <b>6kgf</b> |
|-----------------------|-------------|-------------|-------------|
| Accuracy [%]          | 80.6        | 78.3        | 86.0        |
| Processing Time [sec] | 521.5       | 1507.6      | 88.7        |
| Data Capacity [Mb]    | 47          | 42          | 48          |

**Table S6.** Doctor blade tilting fault diagnosis result based on X axis of sensor 1

| <b>[SVM]</b>          | <b>2kgf</b> | <b>4kgf</b>  | <b>6kgf</b> |
|-----------------------|-------------|--------------|-------------|
| Accuracy [%]          | 85.7        | <b>84.0</b>  | <b>91.3</b> |
| Processing Time [sec] | 264.6       | <b>495.7</b> | <b>31.6</b> |
| Data Capacity [Mb]    | 15          | <b>13</b>    | <b>15</b>   |

**Table S7.** Doctor blade tilting fault diagnosis result based on Y axis of sensor 1

| <b>[SVM]</b>          | <b>2kgf</b>  | <b>4kgf</b> | <b>6kgf</b> |
|-----------------------|--------------|-------------|-------------|
| Accuracy [%]          | <b>86.9</b>  | 83.6        | 91.1        |
| Processing Time [sec] | <b>254.6</b> | 512.8       | 35.0        |
| Data Capacity [Mb]    | <b>14</b>    | 14          | 14          |

**Table S8.** Doctor blade tilting fault diagnosis result based on Z axis of sensor 1

| <b>[SVM]</b>          | <b>2kgf</b> | <b>4kgf</b> | <b>6kgf</b> |
|-----------------------|-------------|-------------|-------------|
| Accuracy [%]          | 82.0        | 81.3        | 89.8        |
| Processing Time [sec] | 289.3       | 527.7       | 42.4        |
| Data Capacity [Mb]    | 15          | 13          | 15          |

**Table S9.** Sensor data efficiency evaluation of printing roll eccentricity fault under case 2kgf and 4kgf.

| [SVM]                                   | Raw data | Sensor 1 | Sensor 2 | Value                                        |
|-----------------------------------------|----------|----------|----------|----------------------------------------------|
| Data Capacity [Mb] ( $\alpha$ )         | 111      | 39       | 41       | $\alpha_{S1} = 2.85$<br>$\alpha_{S2} = 2.71$ |
| Processing Time [sec] ( $\beta$ )       | 237.9    | 15.9     | 15.4     | $\beta_{S1} = 14.96$<br>$\beta_{S2} = 15.45$ |
| Misclassification Rate [%] ( $\gamma$ ) | 25.2     | 9.3      | 7.7      | $\gamma_{S1} = 0.37$<br>$\gamma_{S2} = 0.31$ |

**Table S10.** Sensor data efficiency evaluation of printing roll eccentricity fault under case 2kgf and 6kgf.

| [SVM]                                   | Raw data | Sensor 1 | Sensor 2 | Value                                        |
|-----------------------------------------|----------|----------|----------|----------------------------------------------|
| Data Capacity [Mb] ( $\alpha$ )         | 111      | 42       | 46       | $\alpha_{S1} = 2.64$<br>$\alpha_{S2} = 2.41$ |
| Processing Time [sec] ( $\beta$ )       | 208.0    | 18.0     | 16.4     | $\beta_{S1} = 11.56$<br>$\beta_{S2} = 12.68$ |
| Misclassification Rate [%] ( $\gamma$ ) | 23.1     | 8.2      | 6.9      | $\gamma_{S1} = 0.35$<br>$\gamma_{S2} = 0.30$ |

**Table S11.** Sensor data efficiency evaluation of printing roll eccentricity fault under case 4kgf and 6kgf.

| [SVM]                                   | Raw data | Sensor 1 | Sensor 2 | Value                                        |
|-----------------------------------------|----------|----------|----------|----------------------------------------------|
| Data Capacity [Mb] ( $\alpha$ )         | 110      | 37       | 41       | $\alpha_{S1} = 2.97$<br>$\alpha_{S2} = 2.68$ |
| Processing Time [sec] ( $\beta$ )       | 237.0    | 14.7     | 12.4     | $\beta_{S1} = 16.12$<br>$\beta_{S2} = 19.11$ |
| Misclassification Rate [%] ( $\gamma$ ) | 30.3     | 15       | 12.2     | $\gamma_{S1} = 0.50$<br>$\gamma_{S2} = 0.40$ |

**Table S12.** Printing roll eccentricity fault diagnosis result based on sensor 1

| <b>[SVM]</b>          | <b>2kgf and 4kgf</b> | <b>2kgf and 6kgf</b> | <b>4kgf and 6kgf</b> |
|-----------------------|----------------------|----------------------|----------------------|
| Accuracy [%]          | 90.7                 | 91.8                 | 85.0                 |
| Processing Time [sec] | 15.9                 | 18.0                 | 14.7                 |
| Data Capacity [Mb]    | 39                   | 42                   | 37                   |

**Table S13.** Printing roll eccentricity fault diagnosis result based on sensor 2

| <b>[SVM]</b>          | <b>2kgf and 4kgf</b> | <b>2kgf and 6kgf</b> | <b>4kgf and 6kgf</b> |
|-----------------------|----------------------|----------------------|----------------------|
| Accuracy [%]          | <b>82.3</b>          | <b>93.1</b>          | <b>87.8</b>          |
| Processing Time [sec] | <b>15.4</b>          | <b>16.4</b>          | <b>12.4</b>          |
| Data Capacity [Mb]    | <b>41</b>            | <b>46</b>            | <b>41</b>            |

**Table S14.** Printing roll eccentricity fault diagnosis result based on X axis of sensor 2

| <b>[SVM]</b>          | <b>2kgf and 4kgf</b> | <b>2kgf and 6kgf</b> | <b>4kgf and 6kgf</b> |
|-----------------------|----------------------|----------------------|----------------------|
| Accuracy [%]          | <b>94.8</b>          | 95.4                 | 90.6                 |
| Processing Time [sec] | <b>8.3</b>           | 10.5                 | 10.3                 |
| Data Capacity [Mb]    | <b>13</b>            | 15                   | 14                   |

**Table S15.** Printing roll eccentricity fault diagnosis result based on Y axis of sensor 2

| <b>[SVM]</b>          | <b>2kgf and 4kgf</b> | <b>2kgf and 6kgf</b> | <b>4kgf and 6kgf</b> |
|-----------------------|----------------------|----------------------|----------------------|
| Accuracy [%]          | 93.4                 | 94.2                 | 92.4                 |
| Processing Time [sec] | 10.1                 | 12.9                 | 7.0                  |
| Data Capacity [Mb]    | 13                   | 16                   | 14                   |

**Table S16.** Printing roll eccentricity fault diagnosis result based on Z axis of sensor 2

| <b>[SVM]</b>          | <b>2kgf and 4kgf</b> | <b>2kgf and 6kgf</b> | <b>4kgf and 6kgf</b> |
|-----------------------|----------------------|----------------------|----------------------|
| Accuracy [%]          | 94.0                 | <b>96.0</b>          | <b>92.7</b>          |
| Processing Time [sec] | 9.9                  | <b>9.7</b>           | <b>5.7</b>           |
| Data Capacity [Mb]    | 15                   | <b>15</b>            | <b>13</b>            |

**Table S17.** Sensor data efficiency evaluation of nip roll eccentricity fault under case 2kgf

| [SVM]                                   | Raw data | Sensor 1 | Sensor 2 | Value                                        |
|-----------------------------------------|----------|----------|----------|----------------------------------------------|
| Data Capacity [Mb] ( $\alpha$ )         | 111      | 42       | 45       | $\alpha_{S1} = 2.64$<br>$\alpha_{S2} = 2.47$ |
| Processing Time [sec] ( $\beta$ )       | 425.4    | 117.1    | 124.7    | $\beta_{S1} = 3.63$<br>$\beta_{S2} = 3.41$   |
| Misclassification Rate [%] ( $\gamma$ ) | 46.2     | 6.2      | 7.0      | $\gamma_{S1} = 0.13$<br>$\gamma_{S2} = 0.15$ |

**Table S18.** Sensor data efficiency evaluation of nip roll eccentricity fault under case 4kgf

| [SVM]                                   | Raw data | Sensor 1 | Sensor 2 | Value                                        |
|-----------------------------------------|----------|----------|----------|----------------------------------------------|
| Data Capacity [Mb] ( $\alpha$ )         | 111      | 39       | 42       | $\alpha_{S1} = 2.85$<br>$\alpha_{S2} = 2.64$ |
| Processing Time [sec] ( $\beta$ )       | 574.4    | 130.1    | 134.4    | $\beta_{S1} = 4.42$<br>$\beta_{S2} = 4.27$   |
| Misclassification Rate [%] ( $\gamma$ ) | 44       | 10.8     | 11.1     | $\gamma_{S1} = 0.25$<br>$\gamma_{S2} = 0.25$ |

**Table S19.** Sensor data efficiency evaluation of nip roll eccentricity fault under case 6kgf

| [SVM]                                   | Raw data | Sensor 1 | Sensor 2 | Value                                        |
|-----------------------------------------|----------|----------|----------|----------------------------------------------|
| Data Capacity [Mb] ( $\alpha$ )         | 114      | 43       | 48       | $\alpha_{S1} = 2.65$<br>$\alpha_{S2} = 2.38$ |
| Processing Time [sec] ( $\beta$ )       | 597.0    | 186.6    | 198.0    | $\beta_{S1} = 3.20$<br>$\beta_{S2} = 3.02$   |
| Misclassification Rate [%] ( $\gamma$ ) | 57.9     | 8.6      | 9.1      | $\gamma_{S1} = 0.15$<br>$\gamma_{S2} = 0.16$ |

**Table S20.** Nip roll eccentricity fault diagnosis result based on sensor 1

| <b>[SVM]</b>          | <b>2kgf</b>  | <b>4kgf</b>  | <b>6kgf</b>  |
|-----------------------|--------------|--------------|--------------|
| Accuracy [%]          | <b>93.8</b>  | <b>89.2</b>  | <b>91.4</b>  |
| Processing Time [sec] | <b>117.1</b> | <b>130.1</b> | <b>186.6</b> |
| Data Capacity [Mb]    | <b>42</b>    | <b>39</b>    | <b>43</b>    |

**Table S21.** Nip roll eccentricity fault diagnosis result based on sensor 2

| <b>[SVM]</b>          | <b>2kgf</b> | <b>4kgf</b> | <b>6kgf</b> |
|-----------------------|-------------|-------------|-------------|
| Accuracy [%]          | 93.0        | 88.9        | 90.9        |
| Processing Time [sec] | 124.7       | 134.4       | 198.0       |
| Data Capacity [Mb]    | 45          | 42          | 48          |



**Table S22.** Nip roll eccentricity fault diagnosis result based on X axis of sensor 1

| <b>[SVM]</b>          | <b>2kgf</b> | <b>4kgf</b> | <b>6kgf</b> |
|-----------------------|-------------|-------------|-------------|
| Accuracy [%]          | 95.2        | <b>92.4</b> | <b>94.5</b> |
| Processing Time [sec] | 40.0        | <b>45.7</b> | <b>58.8</b> |
| Data Capacity [Mb]    | 14          | <b>13</b>   | <b>14</b>   |

**Table S23.** Nip roll eccentricity fault diagnosis result based on Y axis of sensor 1

| <b>[SVM]</b>          | <b>2kgf</b> | <b>4kgf</b> | <b>6kgf</b> |
|-----------------------|-------------|-------------|-------------|
| Accuracy [%]          | 94.1        | 92.2        | 94.5        |
| Processing Time [sec] | 44.4        | 44.7        | 68.6        |
| Data Capacity [Mb]    | 14          | 12          | 15          |

**Table S24.** Nip roll eccentricity fault diagnosis result based on Z axis of sensor 1

| <b>[SVM]</b>          | <b>2kgf</b> | <b>4kgf</b> | <b>6kgf</b> |
|-----------------------|-------------|-------------|-------------|
| Accuracy [%]          | <b>96.8</b> | 92.2        | 92.9        |
| Processing Time [sec] | <b>35.7</b> | 44.9        | 75.0        |
| Data Capacity [Mb]    | <b>14</b>   | 14          | 14          |

**Table S25.** Sensor data efficiency evaluation of nip force non-uniformity fault under case 4kgf

| [SVM]                                   | Raw data | Sensor 1 | Sensor 2 | Value                                        |
|-----------------------------------------|----------|----------|----------|----------------------------------------------|
| Data Capacity [Mb] ( $\alpha$ )         | 115      | 45       | 48       | $\alpha_{S1} = 2.56$<br>$\alpha_{S2} = 2.40$ |
| Processing Time [sec] ( $\beta$ )       | 281.7    | 55.0     | 52.1     | $\beta_{S1} = 5.12$<br>$\beta_{S2} = 5.41$   |
| Misclassification Rate [%] ( $\gamma$ ) | 34.5     | 11.8     | 11.3     | $\gamma_{S1} = 0.34$<br>$\gamma_{S2} = 0.33$ |

**Table S26.** Sensor data efficiency evaluation of nip force non-uniformity fault under case 6kgf

| [SVM]                                   | Raw data | Sensor 1 | Sensor 2 | Value                                        |
|-----------------------------------------|----------|----------|----------|----------------------------------------------|
| Data Capacity [Mb] ( $\alpha$ )         | 116      | 44       | 48       | $\alpha_{S1} = 2.64$<br>$\alpha_{S2} = 2.42$ |
| Processing Time [sec] ( $\beta$ )       | 515.4    | 72.3     | 70.7     | $\beta_{S1} = 7.13$<br>$\beta_{S2} = 7.29$   |
| Misclassification Rate [%] ( $\gamma$ ) | 34.6     | 14.2     | 13.4     | $\gamma_{S1} = 0.41$<br>$\gamma_{S2} = 0.39$ |

**Table S27.** Nip force non-uniformity fault diagnosis result based on sensor 1

| <b>[SVM]</b>          | <b>4kgf</b> | <b>6kgf</b> |
|-----------------------|-------------|-------------|
| Accuracy [%]          | 88.2        | 85.8        |
| Processing Time [sec] | 55.0        | 72.3        |
| Data Capacity [Mb]    | 45          | 44          |

**Table S28.** Nip force non-uniformity fault diagnosis result based on sensor 2

| <b>[SVM]</b>          | <b>4kgf</b> | <b>6kgf</b> |
|-----------------------|-------------|-------------|
| Accuracy [%]          | 88.7        | 86.6        |
| Processing Time [sec] | 52.1        | 70.7        |
| Data Capacity [Mb]    | 48          | 48          |

**Table S29.** Nip force non-uniformity fault diagnosis result based on X axis of sensor 2

| <b>[SVM]</b>          | <b>4kgf</b> | <b>6kgf</b> |
|-----------------------|-------------|-------------|
| Accuracy [%]          | 90.3        | <b>90.7</b> |
| Processing Time [sec] | 31.6        | <b>44.4</b> |
| Data Capacity [Mb]    | 16          | <b>14</b>   |

**Table S30.** Nip force non-uniformity fault diagnosis result based on Y axis of sensor 2

| <b>[SVM]</b>          | <b>4kgf</b> | <b>6kgf</b> |
|-----------------------|-------------|-------------|
| Accuracy [%]          | <b>91.4</b> | 90.0        |
| Processing Time [sec] | <b>27.0</b> | 47.5        |
| Data Capacity [Mb]    | <b>16</b>   | 15          |

**Table S31.** Nip force non-uniformity fault diagnosis result based on Z axis of sensor 2

| <b>[SVM]</b>          | <b>4kgf</b> | <b>6kgf</b> |
|-----------------------|-------------|-------------|
| Accuracy [%]          | 91.0        | 90.2        |
| Processing Time [sec] | 24.6        | 46.2        |
| Data Capacity [Mb]    | 16          | 15          |

**Table S32.** Doctor blade tilting fault diagnosis with various machine learning algorithms

| Algorithm                     | Accuracy [%] | Positive Predictive Value [%] | Processing Time [sec] |
|-------------------------------|--------------|-------------------------------|-----------------------|
| Bayesian Logistic Regression  | 93.1         | 93.0                          | 27.0                  |
| Boosted Logistic Regression   | 90.4         | 90.2                          | 32.1                  |
| K-Nearest Neighbor            | 90.6         | 90.1                          | 30.7                  |
| Linear Discriminant Analysis  | 95.8         | 94.5                          | 19.5                  |
| Logistic Regression           | 87.6         | 96.6                          | 40.8                  |
| Naïve Bayes                   | 88.7         | 88.5                          | 40.1                  |
| Random Forest                 | 84.5         | 82.7                          | 39.8                  |
| <b>Support Vector Machine</b> | <b>97.0</b>  | <b>97.0</b>                   | <b>16.6</b>           |

**Table S33.** Printing roll eccentricity fault diagnosis with various machine learning algorithms

| Algorithm                     | Accuracy [%] | Positive Predictive Value [%] | Processing Time [sec] |
|-------------------------------|--------------|-------------------------------|-----------------------|
| Bayesian Logistic Regression  | 88.7         | 88.5                          | 14.0                  |
| Boosted Logistic Regression   | 84.5         | 84.5                          | 17.8                  |
| K-Nearest Neighbor            | 94.1         | 93.7                          | 8.0                   |
| Linear Discriminant Analysis  | 97.9         | 96.7                          | 7.8                   |
| Logistic Regression           | 72.6         | 72.4                          | 40.0                  |
| Naïve Bayes                   | 83.3         | 83.0                          | 19.4                  |
| Random Forest                 | 90.7         | 90.0                          | 5.7                   |
| <b>Support Vector Machine</b> | <b>99.1</b>  | <b>94.9</b>                   | <b>5.1</b>            |

**Table S34.** Nip roll eccentricity fault diagnosis with various machine learning algorithms

| Algorithm                     | Accuracy [%] | Positive Predictive Value [%] | Processing Time [sec] |
|-------------------------------|--------------|-------------------------------|-----------------------|
| Bayesian Logistic Regression  | 94.4         | 94.0                          | 4.7                   |
| Boosted Logistic Regression   | 97.0         | 95.5                          | 5.7                   |
| K-Nearest Neighbor            | 91.4         | 90.8                          | 11.0                  |
| Linear Discriminant Analysis  | 74.1         | 73.1                          | 37.4                  |
| Logistic Regression           | 90.3         | 90.3                          | 13.3                  |
| Naïve Bayes                   | 89.0         | 88.4                          | 27.1                  |
| Random Forest                 | 99.2         | 94.5                          | 22.9                  |
| <b>Support Vector Machine</b> | <b>100.0</b> | <b>98.8</b>                   | <b>4.6</b>            |

**Table S35.** Nip force non-uniformity fault diagnosis with various machine learning algorithms

| Algorithm                     | Accuracy [%] | Positive Predictive Value [%] | Processing Time [sec] |
|-------------------------------|--------------|-------------------------------|-----------------------|
| Bayesian Logistic Regression  | 67.5         | 67.0                          | 78.1                  |
| Boosted Logistic Regression   | 61.3         | 58.1                          | 60.8                  |
| K-Nearest Neighbor            | 95.8         | 94.5                          | 28.4                  |
| Linear Discriminant Analysis  | 92.0         | 92.0                          | 20.7                  |
| Logistic Regression           | 70.7         | 66.8                          | 72.0                  |
| Naïve Bayes                   | 94.9         | 93.4                          | 25.1                  |
| Random Forest                 | 98.3         | 97.7                          | 40.8                  |
| <b>Support Vector Machine</b> | <b>97.9</b>  | <b>93.5</b>                   | <b>25.4</b>           |
